# Supplementary material for: Novel DNA Methylation Sites Influence GPR15 Expression in Relation to Smoking
Source: MDPI journal article supplement (doi:10.3390/biom8030074), 2018-08-20
Supplement: s1 [file s1]

## Supplementary material

Novel DNA methylation sites influence *GPR15*  
expression in relation to smoking

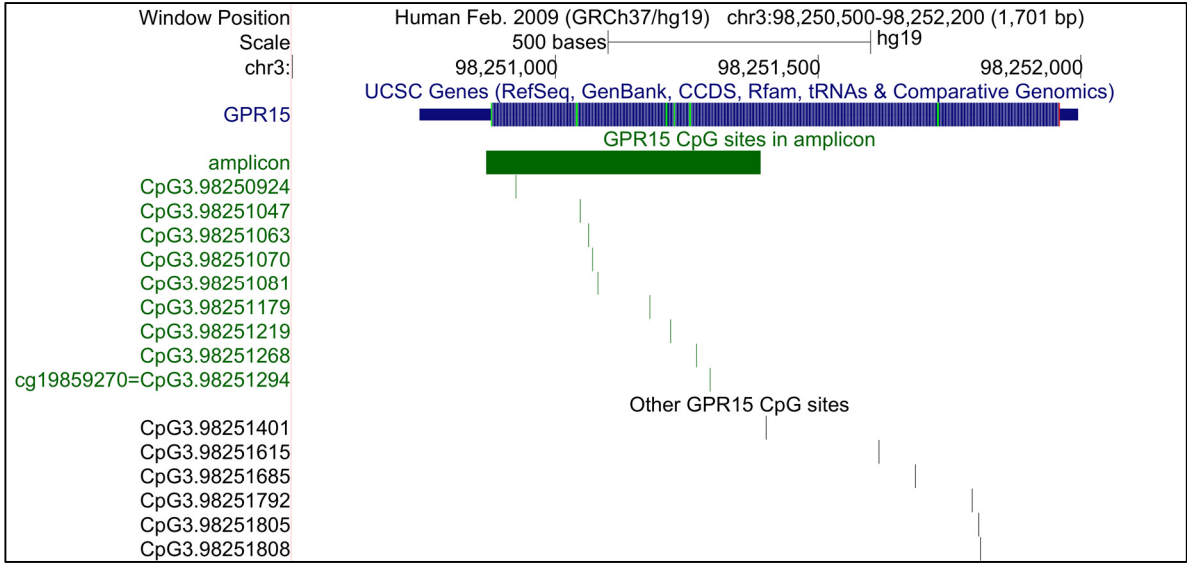

**Figure S1.** The *GPR15* locus in the UCSC Genome Browser human GRCh37/hg19 assembly. Nine out of 15 CpG sites within the *GPR15* exon were measured with the EpiTYPER amplicon. Due to low mass of the cleavage product, CpG3.98250924 and CpG3.98251081 could not be analysed. CpG3.98251268 was fully methylated in 90% of the samples. CpG3.98251047, CpG3.98251063, CpG3.98251070, CpG3.98251179, CpG3.98251219 and CpG3.98251294 were analysed. Adapted from <http://genome.ucsc.edu/>

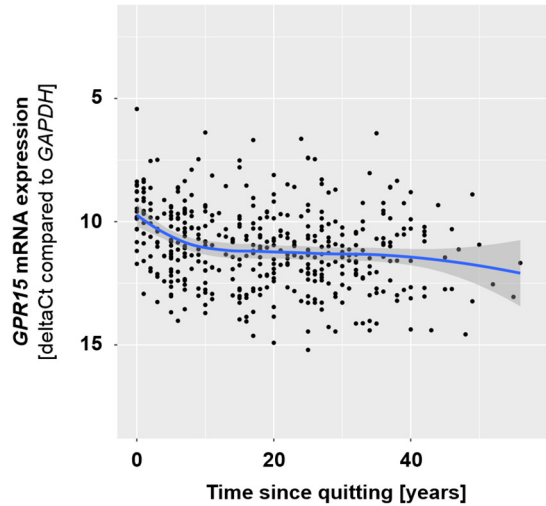

**Figure S2.** *GPR15* mRNA expression after smoking cessation. *GPR15* mRNA expression decreased more rapidly within the first years after smoking cessation.  $n = 427$ , *GPR15* mRNA expression is depicted as deltaCt values normalized to *GAPDH* mRNA expression. Lower deltaCt values indicate higher *GPR15* mRNA expression.

**Table S1:** Mass fragments detected by the EpiTYPER assay.

| DNA methylation site | Comment    | Explanation                                                                                                                    |
|----------------------|------------|--------------------------------------------------------------------------------------------------------------------------------|
| CpG3.98250924        | L_mass SN4 | CpG unit with low mass (<1500Da) leading to unreliable methylation values; silent peak overlap with four non-methylated peaks  |
| CpG3.98251047        | NA         | -                                                                                                                              |
| CpG3:98251063        | SN1        | silent peak overlap with one non-methylated peak                                                                               |
| CpG3:98251070        | SN1        | silent peak overlap with one non-methylated peak                                                                               |
| CpG3:98251081        | L_mass SN3 | CpG unit with low mass (<1500Da) leading to unreliable methylation values; silent peak overlap with three non-methylated peaks |
| CpG3.98251179        | NA         | -                                                                                                                              |
| CpG3.98251219        | SN1        | silent peak overlap with one non-methylated peak                                                                               |
| CpG3.98251268        | SN2        | silent peak overlap with two non-methylated peaks                                                                              |
| CpG3:98251294        | SN1        | silent peak overlap with one non-methylated peak                                                                               |

26

**Table S2:** Results from linear mixed regression analyses.

| Dependent variable | Independent variables           | Effect | Standard error | p value  |
|--------------------|---------------------------------|--------|----------------|----------|
| GPR15mRNA          | Age + Sex + Current_smoking     | -2.699 | 0.134          | 1.02e-77 |
| GPR15mRNA          | Age + Sex + Pack_years          | 0.0631 | 0.005          | 2.95e-34 |
| GPR15mRNA          | Age + Sex + Time_since_quitting | 0.0310 | 0.007          | 3.81e-06 |
| CpG3.98251047      | Age + Sex + Current_smoking     | -3.376 | 0.694          | 1.37e-06 |
| CpG3:98251063      | Age + Sex + Current_smoking     | -1.495 | 1.951          | 0.443    |
| CpG3:98251070      | Age + Sex + Current_smoking     | -4.607 | 3.219          | 0.153    |
| CpG3.98251179      | Age + Sex + Current_smoking     | -4.655 | 1.234          | 1.78e-04 |
| CpG3.98251219      | Age + Sex + Current_smoking     | -3.609 | 1.178          | 2.24e-03 |
| CpG3:98251294      | Age + Sex + Current_smoking     | 2.439  | 2.336          | 0.297    |
| CpG3.98251047      | Age + Sex + Pack_years          | -0.030 | 0.041          | 0.461    |
| CpG3:98251063      | Age + Sex + Pack_years          | -0.045 | 0.103          | 0.661    |
| CpG3:98251070      | Age + Sex + Pack_years          | -0.181 | 0.165          | 0.279    |
| CpG3.98251179      | Age + Sex + Pack_years          | -0.065 | 0.078          | 0.406    |
| CpG3.98251219      | Age + Sex + Pack_years          | 0.021  | 0.066          | 0.755    |
| CpG3:98251294      | Age + Sex + Pack_years          | 0.008  | 0.123          | 0.950    |
| CpG3.98251047      | Age + Sex + Time_since_quitting | 0.123  | 0.039          | 1.67-03  |
| CpG3:98251063      | Age + Sex + Time_since_quitting | -0.040 | 0.102          | 0.695    |
| CpG3:98251070      | Age + Sex + Time_since_quitting | -0.014 | 0.201          | 0.945    |
| CpG3.98251179      | Age + Sex + Time_since_quitting | 0.001  | 0.068          | 0.983    |
| CpG3.98251219      | Age + Sex + Time_since_quitting | -0.049 | 0.063          | 0.437    |
| CpG3:98251294      | Age + Sex + Time_since_quitting | -0.032 | 0.128          | 0.802    |
| GPR15mRNA          | Age + Sex + CpG3.98251047       | 0.036  | 0.009          | 4.86e-05 |
| GPR15mRNA          | Age + Sex + CpG3:98251063       | 0.000  | 0.002          | 0.827    |
| GPR15mRNA          | Age + Sex + CpG3:98251070       | 0.005  | 0.004          | 0.24     |
| GPR15mRNA          | Age + Sex + CpG3.98251179       | 0.024  | 0.007          | 4.72-04  |
| GPR15mRNA          | Age + Sex + CpG3.98251219       | 0.006  | 0.004          | 0.109    |
| GPR15mRNA          | Age + Sex + CpG3:98251294       | -0.002 | 0.002          | 0.407    |

27

28
