# Supplementary material for: Novel DNA Methylation Sites Influence GPR15 Expression in Relation to Smoking
Source: MDPI journal article supplement (doi:10.3390/biom8030074), 2018-08-20
Supplement: s1 [file s1]

## Supplementary material

Novel DNA methylation sites influence *GPR15*  
expression in relation to smoking

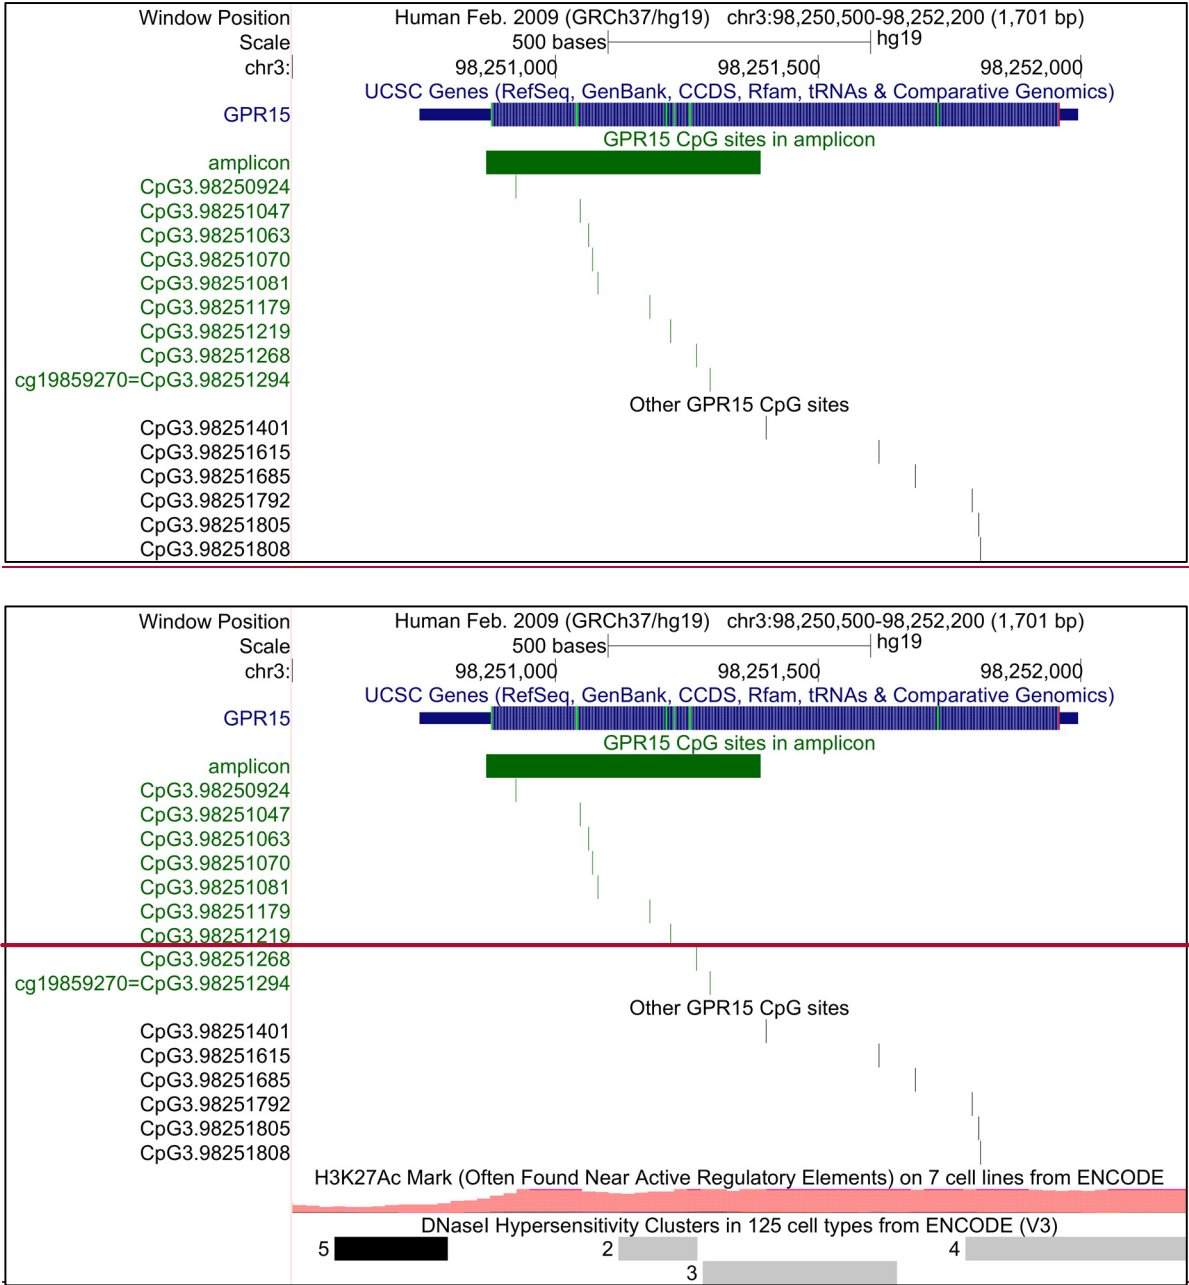

**Figure S1.** The *GPR15* locus in the UCSC Genome Browser human GRCh37/hg19 assembly. Nine out of 15 CpG sites within the *GPR15* exon were measured with the EpiTYPER amplicon. Due to low mass of the cleavage product, CpG3.98250924 and CpG3.98251081 could not be analysed. CpG3.98251268 was fully methylated in 90% of the samples. CpG3.98251047, CpG3.98251063, CpG3.98251070, CpG3.98251179, CpG3.98251219 and CpG3.98251294 were analysed. Experimentally determined DNase hypersensitivity sites imply open chromatin and H3K27Ac peaks point to regulatory elements. Adapted from <http://genome.ucsc.edu/>

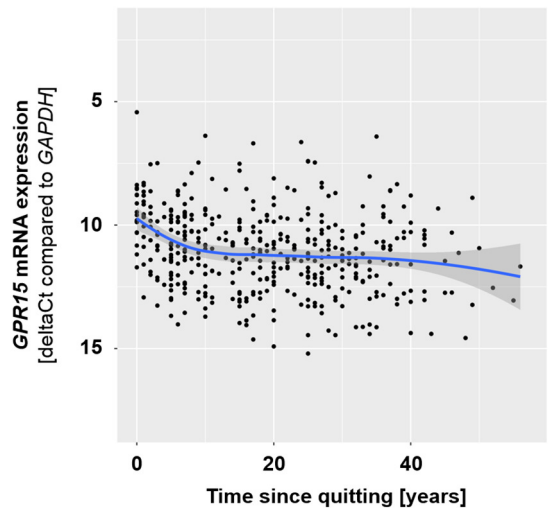

**Figure S2.** *GPR15* mRNA expression after smoking cessation. *GPR15* mRNA expression decreased more rapidly within the first years after smoking cessation. n = 427, *GPR15* mRNA expression is depicted as deltaCt values normalized to *GAPDH* mRNA expression. Lower deltaCt values indicate higher *GPR15* mRNA expression.

**Table S1:** Mass fragments detected by the EpiTYPER assay.

| DNA methylation site          | Comment                    | Explanation                                                                                                                                       |
|-------------------------------|----------------------------|---------------------------------------------------------------------------------------------------------------------------------------------------|
| <a href="#">CpG3.98250924</a> | <a href="#">L mass SN4</a> | <a href="#">CpG unit with low mass (&lt;1500Da) leading to unreliable methylation values; silent peak overlap with four non-methylated peaks</a>  |
| <a href="#">CpG3.98251047</a> | <a href="#">NA</a>         | =                                                                                                                                                 |
| <a href="#">CpG3.98251063</a> | <a href="#">SN1</a>        | <a href="#">silent peak overlap with one non-methylated peak</a>                                                                                  |
| <a href="#">CpG3.98251070</a> | <a href="#">SN1</a>        | <a href="#">silent peak overlap with one non-methylated peak</a>                                                                                  |
| <a href="#">CpG3.98251081</a> | <a href="#">L mass SN3</a> | <a href="#">CpG unit with low mass (&lt;1500Da) leading to unreliable methylation values; silent peak overlap with three non-methylated peaks</a> |
| <a href="#">CpG3.98251179</a> | <a href="#">NA</a>         | =                                                                                                                                                 |
| <a href="#">CpG3.98251219</a> | <a href="#">SN1</a>        | <a href="#">silent peak overlap with one non-methylated peak</a>                                                                                  |
| <a href="#">CpG3.98251268</a> | <a href="#">SN2</a>        | <a href="#">silent peak overlap with two non-methylated peaks</a>                                                                                 |
| <a href="#">CpG3.98251294</a> | <a href="#">SN1</a>        | <a href="#">silent peak overlap with one non-methylated peak</a>                                                                                  |

**Table S42:** Results from linear mixed regression analyses.

| Dependent variable | Independent variables           | Effect | Standard error | p value  |
|--------------------|---------------------------------|--------|----------------|----------|
| GPR15mRNA          | Age + Sex + Current_smoking     | -2.699 | 0.134          | 1.02e-77 |
| GPR15mRNA          | Age + Sex + Pack_years          | 0.0631 | 0.005          | 2.95e-34 |
| GPR15mRNA          | Age + Sex + Time_since_quitting | 0.0310 | 0.007          | 3.81e-06 |

|               |                                 |        |       |          |
|---------------|---------------------------------|--------|-------|----------|
| CpG3.98251047 | Age + Sex + Current_smoking     | -3.376 | 0.694 | 1.37e-06 |
| CpG3:98251063 | Age + Sex + Current_smoking     | -1.495 | 1.951 | 0.443    |
| CpG3:98251070 | Age + Sex + Current_smoking     | -4.607 | 3.219 | 0.153    |
| CpG3.98251179 | Age + Sex + Current_smoking     | -4.655 | 1.234 | 1.78e-04 |
| CpG3.98251219 | Age + Sex + Current_smoking     | -3.609 | 1.178 | 2.24e-03 |
| CpG3:98251294 | Age + Sex + Current_smoking     | 2.439  | 2.336 | 0.297    |
|               |                                 |        |       |          |
| CpG3.98251047 | Age + Sex + Pack_years          | -0.030 | 0.041 | 0.461    |
| CpG3:98251063 | Age + Sex + Pack_years          | -0.045 | 0.103 | 0.661    |
| CpG3:98251070 | Age + Sex + Pack_years          | -0.181 | 0.165 | 0.279    |
| CpG3.98251179 | Age + Sex + Pack_years          | -0.065 | 0.078 | 0.406    |
| CpG3.98251219 | Age + Sex + Pack_years          | 0.021  | 0.066 | 0.755    |
| CpG3:98251294 | Age + Sex + Pack_years          | 0.008  | 0.123 | 0.950    |
|               |                                 |        |       |          |
| CpG3.98251047 | Age + Sex + Time_since_quitting | 0.123  | 0.039 | 1.67-03  |
| CpG3:98251063 | Age + Sex + Time_since_quitting | -0.040 | 0.102 | 0.695    |
| CpG3:98251070 | Age + Sex + Time_since_quitting | -0.014 | 0.201 | 0.945    |
| CpG3.98251179 | Age + Sex + Time_since_quitting | 0.001  | 0.068 | 0.983    |
| CpG3.98251219 | Age + Sex + Time_since_quitting | -0.049 | 0.063 | 0.437    |
| CpG3:98251294 | Age + Sex + Time_since_quitting | -0.032 | 0.128 | 0.802    |
|               |                                 |        |       |          |
| GPR15mRNA     | Age + Sex + CpG3.98251047       | 0.036  | 0.009 | 4.86e-05 |
| GPR15mRNA     | Age + Sex + CpG3:98251063       | 0.000  | 0.002 | 0.827    |
| GPR15mRNA     | Age + Sex + CpG3:98251070       | 0.005  | 0.004 | 0.24     |
| GPR15mRNA     | Age + Sex + CpG3.98251179       | 0.024  | 0.007 | 4.72-04  |
| GPR15mRNA     | Age + Sex + CpG3.98251219       | 0.006  | 0.004 | 0.109    |
| GPR15mRNA     | Age + Sex + CpG3:98251294       | -0.002 | 0.002 | 0.407    |

26

27
